# Supplementary material for: Enhanced Risk Stratification in Early-Stage Endometrial Cancer: Integrating POLE through Droplet Digital PCR and L1CAM
Source: MDPI journal article supplement (doi:10.3390/cancers15194899), 2023-10-09
Supplement: s1 [file s1]

Table S1. Clinicopathological characteristics according to molecular classification in early-stage endometrial cancer patients (n=183).

| Characteristics         | n=183 | <i>POLEmut</i><br>n=29 | MMR-D<br>n=53 | p53abn<br>n=16 | NSMP<br>n=76 | p-value |
|-------------------------|-------|------------------------|---------------|----------------|--------------|---------|
| Age                     |       |                        |               |                |              | 0.098   |
| < 60                    | 134   | 22 (16.4%)             | 43 (32.1%)    | 8 (6.0%)       | 61 (45.5%)   |         |
| ≥ 60                    | 49    | 7 (14.3%)              | 10 (20.4%)    | 8 (16.3%)      | 24 (49.0%)   |         |
| OP                      |       |                        |               |                |              | 0.520   |
| Hysterectomy            | 7     | 0 (0.0%)               | 2 (28.6%)     | 1 (14.3%)      | 4 (57.1%)    |         |
| Hys+BSO                 | 19    | 1 (5.3%)               | 4 (21.1%)     | 2 (10.5%)      | 12 (63.2%)   |         |
| Hys+BSO+LD              | 157   | 28 (17.8%)             | 47 (29.9%)    | 13 (8.3%)      | 69 (43.9%)   |         |
| Histologic type         |       |                        |               |                |              | <0.001  |
| Endometrioid            | 166   | 29 (17.5%)             | 51 (30.7%)    | 4 (2.4%)       | 82 (49.4%)   |         |
| Non-endometrioid        | 17    | 0 (0.0%)               | 2 (11.8%)     | 12 (70.6%)     | 3 (17.6%)    |         |
| Histologic grade        |       |                        |               |                |              | <0.001  |
| Low                     | 146   | 24 (16.4%)             | 43 (29.5%)    | 4 (2.7%)       | 75 (51.4%)   |         |
| High                    | 37    | 5 (13.5%)              | 10 (27.0%)    | 12 (32.4%)     | 10 (27.0%)   |         |
| LVSI                    |       |                        |               |                |              | 0.223   |
| Absent                  | 152   | 26 (17.1%)             | 40 (26.3%)    | 15 (9.9%)      | 71 (46.7%)   |         |
| Present                 | 31    | 3 (9.7%)               | 13 (41.9%)    | 1 (3.2%)       | 14 (45.2%)   |         |
| Myometrial invasion     |       |                        |               |                |              | 0.324   |
| <50%                    | 145   | 24 (16.6%)             | 40 (27.6%)    | 14 (9.7%)      | 67 (46.2%)   |         |
| >50%                    | 38    | 5 (13.2%)              | 13 (34.2%)    | 2 (5.3%)       | 18 (47.4%)   |         |
| FIGO stage 2009         |       |                        |               |                |              | 0.718   |
| IA                      | 133   | 23 (17.3%)             | 36 (27.1%)    | 14 (10.5%)     | 60 (45.1%)   |         |
| IB                      | 33    | 5 (15.2%)              | 11 (33.3%)    | 0 (0.0%)       | 17 (51.5%)   |         |
| II                      | 15    | 1 (6.7%)               | 5 (33.3%)     | 2 (13.3%)      | 7 (46.7%)    |         |
| III                     | 2     | 0 (0.0%)               | 1 (50.0%)     | 0 (0.0%)       | 1 (50.0%)    |         |
| FIGO stage updated 2023 |       |                        |               |                |              | <0.001  |
| IA                      | 109   | 20 (18.3%)             | 29 (26.6%)    | 4 (3.7%)       | 56 (51.4%)   |         |
| IB                      | 18    | 2 (11.1%)              | 6 (33.3%)     | 0 (0.0%)       | 10 (55.6%)   |         |
| IC                      | 8     | 0 (0.0%)               | 2 (25.0%)     | 2 (25.0%)      | 4 (50.0%)    |         |
| IIA                     | 9     | 1 (11.1%)              | 2 (22.2%)     | 0 (0.0%)       | 6 (66.7%)    |         |
| IIB                     | 10    | 1 (10.0%)              | 6 (60.0%)     | 0 (0.0%)       | 3 (30.0%)    |         |
| IIC                     | 29    | 5 (17.2%)              | 8 (27.6%)     | 10 (34.5%)     | 6 (20.7%)    |         |
| Prognostic risk group*  |       |                        |               |                |              | <0.001  |
| Low                     | 100   | 20 (20.0%)             | 28 (28.0%)    | 3 (3.0%)       | 49 (49.0%)   |         |
| Intermediate            | 20    | 3 (15.0%)              | 6 (30.0%)     | 2 (10.0%)      | 9 (45.0%)    |         |
| High intermediate       | 47    | 6 (12.8%)              | 17 (36.2%)    | 1 (2.1%)       | 23 (48.9%)   |         |
| High                    | 16    | 0 (0.0%)               | 2 (12.5%)     | 10 (62.5%)     | 4 (25.0%)    |         |
| Adjuvant treatment      |       |                        |               |                |              | 0.058   |
| None                    | 147   | 25 (17.0%)             | 41 (27.9%)    | 12 (8.2%)      | 69 (46.9%)   |         |
| Radiotherapy            | 25    | 4 (16.0%)              | 8 (32.0%)     | 0 (0.0%)       | 13 (28.6%)   |         |
| Chemotherapy            | 7     | 0 (0.0%)               | 2 (28.6%)     | 3 (42.9%)      | 2 (52.0%)    |         |
| Chemoradiotherapy       | 4     | 0 (0.0%)               | 2 (50.0%)     | 1 (25.0%)      | 1 (25.0%)    |         |

BSO, Bilateral salpingo-oophorectomy; LD, Lymph node dissection; FIGO, International Federation of Gynecology and Obstetrics; LVSI, lymphovascular space invasion; MMR-D, mismatch repair-deficient; p53abn, p53 mutated; NSMP, no specific molecular profile; *POLEmut*, DNA polymerase epsilon-mutated; \*risk stratified according to the European Society for Medical Oncology (ESMO), European Society for Radiotherapy & Oncology (ESTRO) and European Society of Gynaecological Oncology (ESGO) consensus guideline.
